# Supplementary material
Source: PubMed Central journal article supplement (PMC2634933)
Supplement: 0810119105_0810119105SI.pdf [file 0810119105_0810119105SI.pdf]

# Supporting Information

Horiuchi *et al.* 10.1073/pnas.0810119105

A.

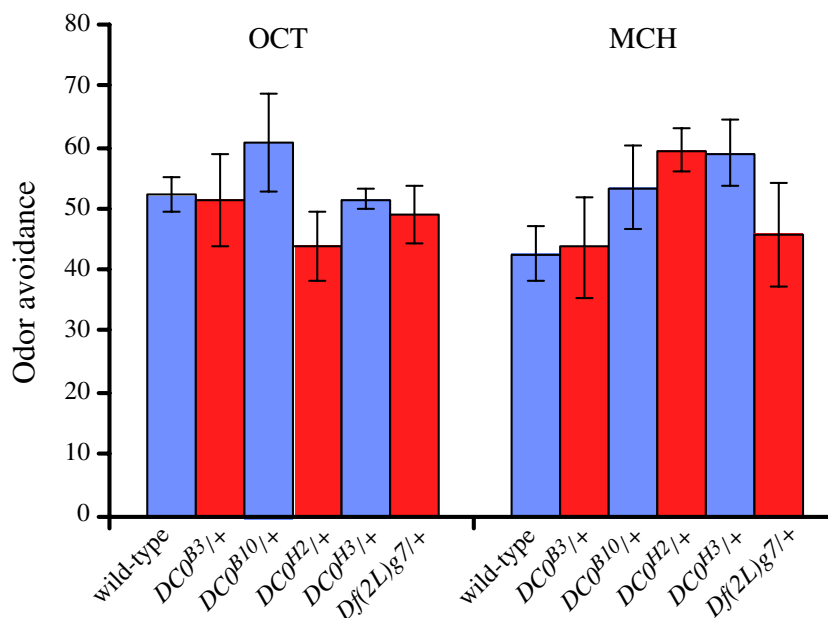

B.

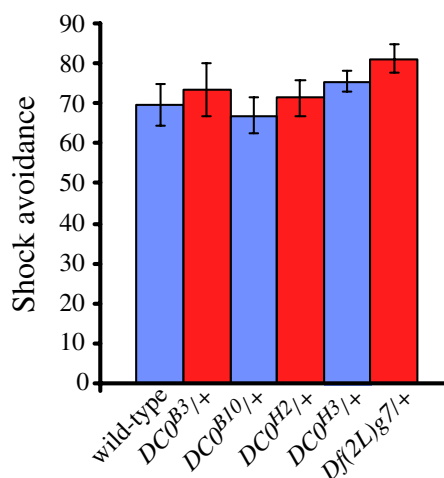

**Fig. S1.** *DC0/+* mutants have (A) normal odor acuity to 3-octanol (OCT) and 4-methylcyclohexanol (MCH) and (B) normal shock reactivity to 60-V electrical shocks. Red bars indicate genotypes with improved memory, and blue bars indicate genotypes with normal memory. No trends linking odor or shock avoidance with improved memory are seen, and no significant differences are observed between genotypes when assayed by 1-way ANOVA ( $P = 0.4191$  for OCT avoidance,  $P = 0.2504$  for MCH avoidance, and  $P = 0.3713$  for shock avoidance).  $n = 6$  for odor experiments and 4 for shock experiments.
